# Supplementary material for: A multi-factor trafficking site on the spliceosome remodeling enzyme BRR2 recruits C9ORF78 to regulate alternative splicing
Source: PubMed Central journal article supplement (PMC8894380; doi:10.1038/s41467-022-28754-2), 2022-03-03
Supplement: 41467_2022_28754_MOESM3_ESM.pdf [file 41467_2022_28754_MOESM3_ESM.pdf]

### Description of Additional Supplementary Files

File Name: Supplementary Data 1

Description: **RNA-seq data.** RNA-seq results upon C9ORF78 KD

File Name: Supplementary Data 2

Description: **MS-based proteomics results.** Proteins enriched in Flag-C9ORF78<sup>wt</sup> IP or Flag-C9ORF78<sup>R41A</sup> IP
